# Supplementary material for: Detection of Enterotoxigenic Escherichia coli and Clostridia in the Aetiology of Neonatal Piglet Diarrhoea: Important Factors for Their Prevention
Source: MDPI journal article supplement (doi:10.3390/life13051092), 2023-04-27
Supplement: s1 [file s1]

| Farm no | Group              | Commercial products                                                       | Composition / Dose                                                                                                                                                                                                                                                                   |
|---------|--------------------|---------------------------------------------------------------------------|--------------------------------------------------------------------------------------------------------------------------------------------------------------------------------------------------------------------------------------------------------------------------------------|
| Farm 1  | Group None         | -                                                                         |                                                                                                                                                                                                                                                                                      |
| Farm 2  | Group AB           | Citramox® LA (Laboratorios Karizoo S.A.)                                  | Amoxicillin 150.00 mg/ml (15 mg of amoxicillin/kg BW)                                                                                                                                                                                                                                |
| Farm 3  | Group AB           | Vetrimoxin® LA (Ceva Animal Health)                                       | Amoxicillin 150.00 mg/ml (15 mg of amoxicillin/kg BW)                                                                                                                                                                                                                                |
| Farm 4  | Group None         | -                                                                         |                                                                                                                                                                                                                                                                                      |
| Farm 5  | Group AC           | Acid LAC® XT dry (Kemin)                                                  | Lactic acid, fumaric acid, citric acid and formic acid (4 Kg/t feed)                                                                                                                                                                                                                 |
| Farm 6  | Group None         | -                                                                         |                                                                                                                                                                                                                                                                                      |
| Farm 7  | Group AB           | Betamox® LA (Norbrook Laboratories)                                       | Amoxicillin 150.00 mg/ml (15 mg of amoxicillin/kg BW)                                                                                                                                                                                                                                |
| Farm 8  | Group AC +AB       | Vetrimoxin® LA (Ceva Animal Health)<br>+<br>Biotronic® (BIOMIN GmbH, DSM) | Organic acid blend (formic, propionic and acetic acid),<br>cinnamaldehyde and a permeabilising substance (3 kg/t feed)<br>+<br>Amoxicillin 150.00 mg/ml (15 mg of amoxicillin/kg BW)                                                                                                 |
| Farm 9  | Group PR + AC      | Bioplus YC (Biochem)<br>+<br>Arma (O3 Benelux GmbH)                       | <i>Bacillus licheniformis</i> (DSM 5749) and <i>Bacillus subtilis</i> (DSM 5750) in a 1:1 ratio (1.6 x 10 <sup>9</sup> CFU + 1.6 x 10 <sup>9</sup> CFU per g product, 400 g/t feed)<br>+<br>Formic acid, propionic acid, phosphoric acid, lactic acid, and acetic acid (3 Kg/t feed) |
| Farm 10 | Group PR + AC      | Bioplus YC (Biochem)<br>+<br>Arma (O3 Benelux GmbH)                       | <i>Bacillus licheniformis</i> (DSM 5749) and <i>Bacillus subtilis</i> (DSM 5750) in a 1:1 ratio (1.6 x 10 <sup>9</sup> CFU + 1.6 x 10 <sup>9</sup> CFU per g product, 400 g/t feed)<br>+<br>Formic acid, propionic acid, phosphoric acid, lactic acid, and acetic acid (3 Kg/t feed) |
| Farm 11 | Group None         | -                                                                         |                                                                                                                                                                                                                                                                                      |
| Farm 12 | Group AB + PR + AC | Vetrimoxin® LA (Ceva Animal Health)<br>+<br>Bioplus YC (Biochem)<br>+     | Amoxicillin 150.00 mg/ml (15 mg of amoxicillin per kg BW)<br>+                                                                                                                                                                                                                       |

|         |                    |                                                                                                  |                                                                                                                                                                                                                                                                                                                                                    |
|---------|--------------------|--------------------------------------------------------------------------------------------------|----------------------------------------------------------------------------------------------------------------------------------------------------------------------------------------------------------------------------------------------------------------------------------------------------------------------------------------------------|
|         |                    | Acid LAC® XT dry (Kemin)                                                                         | <i>Bacillus licheniformis</i> (DSM 5749) and <i>Bacillus subtilis</i> (DSM 5750) in a 1:1 ratio (1.6 × 10 <sup>9</sup> CFU + 1.6 × 10 <sup>9</sup> CFU per g product, 400 g/t feed)<br>+<br>Formic acid, propionic acid, phosphoric acid, lactic acid, and acetic acid (3 Kg/t feed)                                                               |
| Farm 13 | Group AB           | Vetrimoxin® LA (Ceva Animal Health)                                                              | Amoxicillin 150.00 mg/ml (15 mg of amoxicillin/kg BW)                                                                                                                                                                                                                                                                                              |
| Farm 14 | Group PR + AB      | Citramox® LA (Laboratorios Karizoo S.A.)<br>+<br>Bioplus YC (Biochem)                            | <i>Bacillus licheniformis</i> (DSM 5749) and <i>Bacillus subtilis</i> (DSM 5750) in a 1:1 ratio (1.6 × 10 <sup>9</sup> CFU + 1.6 × 10 <sup>9</sup> CFU per g product, 400 g/t feed)<br>+<br>Amoxicillin 150.00 mg/ml (15 mg of amoxicillin/kg BW)                                                                                                  |
| Farm 15 | Group AB           | Citramox® LA (Laboratorios Karizoo S.A.)                                                         | Amoxicillin 150.00 mg/ml (15 mg of amoxicillin/kg BW)                                                                                                                                                                                                                                                                                              |
| Farm 16 | Group PR + AC      | Bioplus YC (Biochem)<br>+<br>Acid LAC® XT dry (Kemin)                                            | <i>Bacillus licheniformis</i> (DSM 5749) and <i>Bacillus subtilis</i> (DSM 5750) in a 1:1 ratio (1.6 × 10 <sup>9</sup> CFU + 1.6 × 10 <sup>9</sup> CFU per g product, 400 g/t feed)<br>+<br>Lactic acid, fumaric acid, citric acid and formic acid (4 Kg/t feed)                                                                                   |
| Farm 17 | Group AB + PR + AC | Betamox® LA (Norbrook Laboratories)<br>+<br>BioPlus® YC (Biochem)<br>+<br>Arma (O3 Benelux GmbH) | Amoxicillin 150.00 mg/ml (15 mg of amoxicillin/kg BW)<br>+<br><i>Bacillus licheniformis</i> (DSM 5749) and <i>Bacillus subtilis</i> (DSM 5750) in a 1:1 ratio (1.6 × 10 <sup>9</sup> CFU + 1.6 × 10 <sup>9</sup> CFU per g product, 400 g/t feed)<br>+<br>Formic acid, propionic acid, phosphoric acid, lactic acid, and acetic acid (3 Kg/t feed) |
| Farm 18 | Group AB           | Betamox® LA (Norbrook Laboratories)                                                              | Amoxicillin 150.00 mg/ml (15 mg of amoxicillin/kg BW)                                                                                                                                                                                                                                                                                              |
| Farm 19 | Group AB           | Betamox® LA (Norbrook Laboratories)                                                              | Amoxicillin 150.00 mg/ml (15 mg of amoxicillin/kg BW)                                                                                                                                                                                                                                                                                              |
| Farm 20 | Group None         | -                                                                                                |                                                                                                                                                                                                                                                                                                                                                    |

|         |                    |                                                                                                        |                                                                                                                                                                                                                                                                                                                                |
|---------|--------------------|--------------------------------------------------------------------------------------------------------|--------------------------------------------------------------------------------------------------------------------------------------------------------------------------------------------------------------------------------------------------------------------------------------------------------------------------------|
| Farm 21 | Group PR           | BioPlus® YC (Biochem)                                                                                  | <i>Bacillus licheniformis</i> (DSM 5749) and <i>Bacillus subtilis</i> (DSM 5750) in a 1:1 ratio (1.6 × 10 <sup>9</sup> CFU + 1.6 × 10 <sup>9</sup> CFU per g product, 400 g/t feed)                                                                                                                                            |
| Farm 22 | Group PR + AC      | BioPlus® YC (Biochem)<br>+<br>Acid LAC® XT dry (Kemin)                                                 | <i>Bacillus licheniformis</i> (DSM 5749) and <i>Bacillus subtilis</i> (DSM 5750) in a 1:1 ratio (1.6 × 10 <sup>9</sup> CFU + 1.6 × 10 <sup>9</sup> CFU per g product, 400 g/t feed)<br>+<br>Lactic acid, fumaric acid, citric acid and formic acid (4 Kg/t feed)                                                               |
| Farm 23 | Group AB           | Betamox® LA (Norbrook Laboratories)                                                                    | Amoxicillin 150.00 mg/ml (15 mg of amoxicillin/kg BW)                                                                                                                                                                                                                                                                          |
| Farm 24 | Group AB + PR + AC | Citramox® LA (Laboratorios Karizoo S.A.)<br>+<br>Bioplus YC (Biochem)<br>+<br>Acid LAC® XT dry (Kemin) | Amoxicillin 150.00 mg/ml (15 mg of amoxicillin/kg BW)<br>+<br><i>Bacillus licheniformis</i> (DSM 5749) and <i>Bacillus subtilis</i> (DSM 5750) in a 1:1 ratio (1.6 × 10 <sup>9</sup> CFU + 1.6 × 10 <sup>9</sup> CFU per g product, 400 g/t feed)<br>+<br>Lactic acid, fumaric acid, citric acid and formic acid (4 Kg/t feed) |
| Farm 25 | Group None         | -                                                                                                      |                                                                                                                                                                                                                                                                                                                                |
| Farm 26 | Group PR           | Bioplus YC (Biochem)                                                                                   | <i>Bacillus licheniformis</i> (DSM 5749) and <i>Bacillus subtilis</i> (DSM 5750) in a 1:1 ratio (1.6 × 10 <sup>9</sup> CFU + 1.6 × 10 <sup>9</sup> CFU per g product, 400 g/t feed)                                                                                                                                            |
